# Supplementary material
Source: MDPI journal article supplement (https://www.mdpi.com/2073-445X/13/3/315)
Supplement: s1 [file s1]

Article

# In Situ Conservation of Dry Meadows

Jože Bavcon \*, Katja Malovrh, Maja Tomšič and Blanka Ravnjak

Biotechnical Faculty, University Botanic Gardens Ljubljana, 1000 Ljubljana, Slovenia;  
katja.malovrh@bf.uni-lj.si (K.M.); maja.tomsic@bf.uni-lj.si (M.T.); blanka.ravnjak@bf.uni-lj.si (B.R.)

\* Correspondence: joze.bavcon@bf.uni-lj.si; Tel.: +386-31759087

## Supplementary Materials

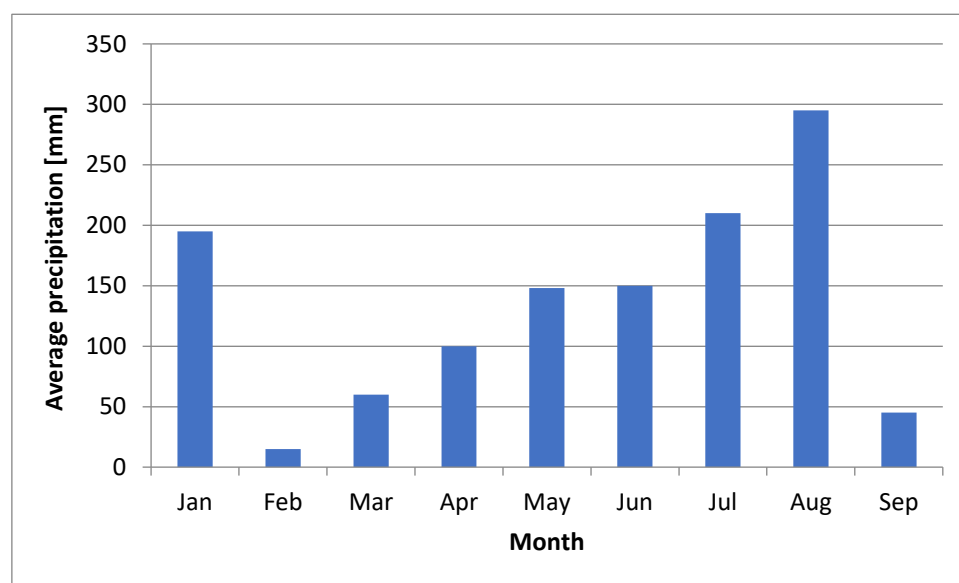

Figure S1. Average month precipitation graph for Ljubljana for year 2023 (Source: <https://me-teo.arso.gov.si/>).

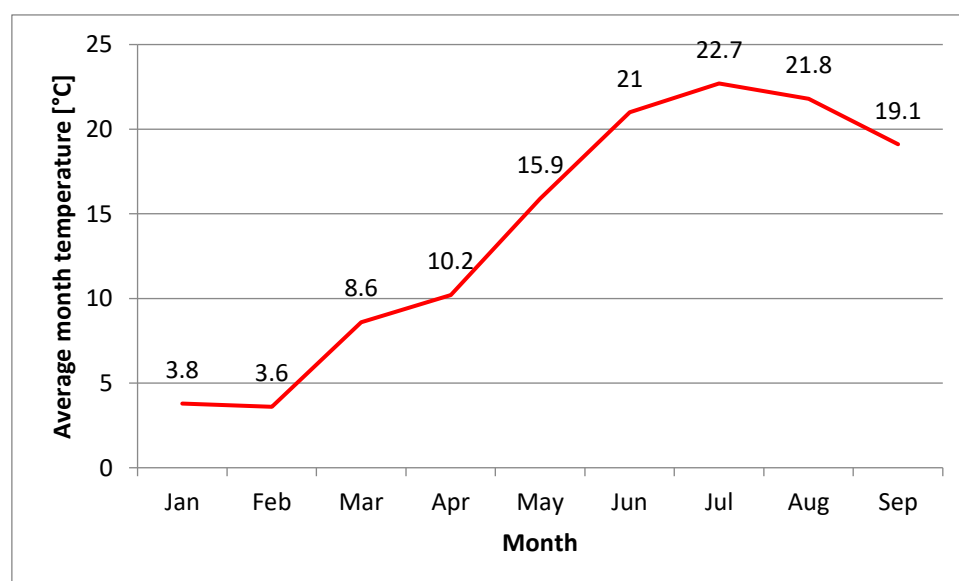

Figure S2. Average month temperature graph for Ljubljana for year 2023 (Source: <https://me-teo.arso.gov.si/>).

**Table S1.** List of plant species present in inventory in years 2001, 2002, 2003, 2016, 2018 and 2023.

| YEAR                                                                    | 2001 | 2002 | 2003 | 2016 | 2018 | 2023 |
|-------------------------------------------------------------------------|------|------|------|------|------|------|
| <i>Achillea millefolium</i> L.                                          | +    | +    | +    | +    | +    | +    |
| <i>Ajuga reptans</i> L.                                                 |      |      |      | +    |      | +    |
| <i>Allium carinatum</i> subsp. <i>carinatum</i> L.                      | +    | +    | +    | +    | +    | +    |
| <i>Anacamptis coriophora</i> (L.) R. M. Bateman, Pridgeon & M. W. Chase | +    | +    | +    |      | +    | +    |
| <i>Anacamptis pyramidalis</i> (L.) Rich.                                |      |      | +    | +    |      | +    |
| <i>Anacamptis morio</i> (L.) R. M. Bateman, Pridgeon & M. W. Chase      |      |      | +    | +    |      |      |
| <i>Anthericum ramosum</i> L.                                            |      | +    | +    | +    | +    | +    |
| <i>Anthoxanthum odoratum</i> L.                                         |      |      | +    | +    |      | +    |
| <i>Anthyllis vulneraria</i> L. subsp. <i>vulneraria</i>                 | +    |      | +    | +    | +    | +    |
| <i>Arrhenatherum elatius</i> (L.) P. Beauv. ex J. & C. Presl            |      |      | +    | +    |      | +    |
| <i>Asperula cynanchica</i> L.                                           |      |      | +    | +    |      | +    |
| <i>Astrantia major</i> L. subsp. <i>major</i>                           | +    | +    | +    | +    | +    | +    |
| <i>Bellis perennis</i> L.                                               |      |      |      |      | +    | +    |
| <i>Betonica officinalis</i> L.                                          |      |      | +    | +    | +    | +    |
| <i>Biscutella laevigata</i> L.                                          | +    | +    | +    | +    | +    | +    |
| <i>Brachypodium pinnatum</i> (L.) PB.                                   |      |      |      |      | +    |      |
| <i>Brachypodium rupestre</i> (Host) Roem. & Schult.                     |      |      | +    | +    |      | +    |
| <i>Briza media</i> L.                                                   |      | +    | +    | +    | +    | +    |
| <i>Bromopsis erecta</i> (Huds.) Fourr.                                  |      | +    | +    | +    | +    | +    |
| <i>Bromus hordeaceus</i> L. em. Hyl. subsp. <i>hordeaceus</i>           |      |      |      |      | +    |      |
| <i>Buphthalmum salicifolium</i> L.                                      | +    | +    | +    | +    | +    | +    |
| <i>Calluna vulgaris</i> (L.) Hull                                       |      | +    | +    |      |      |      |
| <i>Campanula glomerata</i> L.                                           | +    | +    | +    | +    | +    | +    |
| <i>Campanula patula</i> L.                                              |      |      |      |      | +    | +    |
| <i>Carex caryophyllaea</i> Latourr.                                     |      |      |      |      | +    |      |
| <i>Carex flacca</i> Schreb.                                             | +    | +    | +    | +    | +    | +    |
| <i>Carex humilis</i> Leyss.                                             |      |      | +    |      |      | +    |
| <i>Carex tomentosa</i> L.                                               |      |      | +    |      |      |      |
| <i>Carlina acaulis</i> L.                                               |      | +    | +    |      |      | +    |
| <i>Centaureum erythraea</i> Rafn                                        |      |      | +    | +    |      |      |
| <i>Centaurea haynaldii</i> Borbás ex Vuk.                               |      |      |      |      | +    | +    |
| <i>Centaurea jacea</i> L.                                               | +    | +    | +    |      |      | +    |
| <i>Centaurea scabiosa</i> L.                                            | +    | +    | +    | +    | +    | +    |
| <i>Cerastium</i> sp.                                                    |      |      |      |      | +    | +    |
| <i>Chamaecytisus purpureus</i> Scop.                                    |      |      | +    | +    |      | +    |
| <i>Chrysopogon gryllus</i> (L.) Trin.                                   |      |      |      | +    | +    |      |
| <i>Cichorium intybus</i> L.                                             |      | +    | +    | +    |      | +    |
| <i>Cirsium erisithales</i> (Jacq.) Scop.                                |      |      |      |      | +    |      |
| <i>Cirsium oleraceum</i> (L.) Scop.                                     |      |      | +    |      |      |      |
| <i>Cirsium pannonicum</i> (L.f.) Link                                   | +    | +    | +    |      | +    | +    |
| <i>Clematis vitalba</i> L.                                              |      |      | +    | +    |      | +    |
| <i>Colchicum autumnale</i> L.                                           | +    | +    | +    | +    |      | +    |
| <i>Crepis biennis</i> L.                                                |      |      |      |      | +    | +    |
| <i>Cruciata glabra</i> (L.) Ehrend.                                     | +    |      |      |      |      |      |
| <i>Cuscuta</i> sp                                                       |      |      |      | +    | +    |      |

|                                                                          |   |   |   |   |   |   |
|--------------------------------------------------------------------------|---|---|---|---|---|---|
| <i>Cynosurus cristatus</i> L.                                            |   |   |   |   | + |   |
| <i>Dactylis glomerata</i> L.                                             |   | + | + | + |   | + |
| <i>Daucus carota</i> L.                                                  |   | + | + | + | + | + |
| <i>Deschampsia cespitosa</i> (L.) P. Beauv.                              |   | + | + | + |   |   |
| <i>Dorycnium germanicum</i> (Gremli) Rikli                               | + |   | + | + |   | + |
| <i>Epipactis palustris</i> (L.) Crantz                                   |   |   | + | + | + | + |
| <i>Euphorbia cyparissias</i> L.                                          |   | + | + | + |   | + |
| <i>Euphorbia verrucosa</i> L.                                            | + | + | + | + | + | + |
| <i>Euphrasia rostkoviana</i> Hayne                                       |   |   | + |   |   | + |
| <i>Festuca pratensis</i> Huds.                                           |   |   |   |   | + |   |
| <i>Festuca valesiaca</i> agg.                                            |   |   |   |   | + |   |
| <i>Filipendula vulgaris</i> Moench                                       | + | + | + | + | + | + |
| <i>Fragaria vesca</i> L.                                                 |   |   | + | + | + | + |
| <i>Galanthus nivalis</i> L.                                              |   |   | + | + |   |   |
| <i>Galium mollugo</i> L.                                                 |   |   | + |   |   |   |
| <i>Galium verum</i> L.                                                   | + | + | + | + | + | + |
| <i>Genista tinctoria</i> L.                                              | + | + | + | + |   | + |
| <i>Gentianella ciliata</i> (L.) Borkh.                                   |   |   |   | + |   |   |
| <i>Gladiolus illyricus</i> Koch                                          | + | + | + | + | + | + |
| <i>Glechoma hederacea</i> L.                                             |   |   |   |   | + | + |
| <i>Globularia punctata</i> Lapeyr.                                       | + |   | + | + | + | + |
| <i>Gymnadenia conopsea</i> subsp. <i>densiflora</i> (Wahlenb.) K. Richt. | + | + | + | + | + | + |
| <i>Helianthemum nummularium</i> (L.) Mill                                | + | + | + | + |   | + |
| <i>Helictotrichon</i> sp.                                                |   |   |   |   |   | + |
| <i>Helictotrichon pubescens</i> (Huds.) Pilger                           |   |   |   |   | + | + |
| <i>Heracleum sphondylium</i> L.                                          |   | + | + | + | + | + |
| <i>Hippocrepis comosa</i> L.                                             |   | + | + | + | + | + |
| <i>Holcus lanatus</i> L.                                                 |   |   |   | + | + | + |
| <i>Hypericum perforatum</i> L.                                           | + |   | + | + | + | + |
| <i>Hypochoeris maculata</i> L.                                           |   | + | + | + | + | + |
| <i>Inula hirta</i> L.                                                    |   |   |   |   |   | + |
| <i>Juncus compressus</i> Jacq.                                           |   |   | + |   |   |   |
| <i>Knautia arvensis</i> (L.) Coulter                                     | + | + | + |   | + | + |
| <i>Knautia drymeia</i> Heuffel subsp. <i>drymeia</i>                     |   |   |   | + |   |   |
| <i>Koeleria pyramidata</i> (Lam.) PB.                                    |   |   |   |   | + |   |
| <i>Lathyrus pratensis</i> L.                                             | + |   | + |   |   |   |
| <i>Lathyrus vernus</i> (L.) Bernh.                                       |   |   |   |   | + |   |
| <i>Leontodon hispidus</i> L.                                             |   | + |   |   | + |   |
| <i>Leucanthemum ircutianum</i> (Turcz.) DC.                              |   |   |   | + | + |   |
| <i>Lilium bulbiferum</i> L.                                              | + |   | + | + | + | + |
| <i>Linum catharticum</i> L.                                              |   | + |   | + |   |   |
| <i>Linum teneifolium</i> L.                                              |   |   | + |   |   |   |
| <i>Linum viscosum</i> L.                                                 | + | + | + | + | + | + |
| <i>Lolium perenne</i> L.                                                 |   |   |   |   |   | + |
| <i>Lonicera caprifolium</i> L.                                           | + | + | + | + | + |   |
| <i>Lotus corniculatus</i> L.                                             | + | + | + | + | + | + |
| <i>Lotus corniculatus</i> L. subsp. <i>hirsutus</i> Rothm.               |   |   |   |   |   | + |
| <i>Luzula campestris</i> (L.) DC.                                        |   |   | + |   | + | + |

|                                                                               |   |   |   |   |   |   |
|-------------------------------------------------------------------------------|---|---|---|---|---|---|
| <i>Lychnis flos-cuculi</i> L.                                                 |   |   |   |   | + | + |
| <i>Medicago lupulina</i> L.                                                   |   | + | + | + | + | + |
| <i>Melilotus officinalis</i> (L.) Lam.                                        |   | + |   |   | + | + |
| <i>Molinia caerulea</i> (L.) Moench subsp. <i>caerulea</i>                    |   | + | + |   | + | + |
| <i>Neotinea x dietrichiana</i> (Bogenh.) H. Kretzschmar,<br>Eccarius & Dietr. |   |   | + | + | + |   |
| <i>Neotinea tridentata</i> (Scop.) R. M. Bateman, Pridg-<br>eon & M. W. Chase |   | + | + |   |   | + |
| <i>Neotinea ustulata</i> (L.) R. M. Bateman, Pridgeon &<br>M. W. Chase        | + | + | + | + |   | + |
| <i>Neottia ovata</i> (L.) Hartm.                                              | + |   | + |   |   |   |
| <i>Onobrychis viciifolia</i> Scop.                                            |   | + | + | + | + | + |
| <i>Ononis spinosa</i> L.                                                      |   | + | + | + | + | + |
| <i>Ophrys holosericea</i> (Burm. f.) Greuter                                  |   | + | + |   | + | + |
| <i>Orchis militaris</i> L.                                                    |   | + | + | + |   | + |
| <i>Ornithogalum pyrenaicum</i> L.                                             | + |   | + | + | + | + |
| <i>Orobanche gracilis</i> Sm.                                                 | + |   | + | + | + | + |
| <i>Orobanche</i> sp.                                                          |   |   |   |   |   | + |
| <i>Pastinaca sativa</i> L.                                                    |   |   |   | + | + |   |
| <i>Pethrorhargia saxifraga</i> (L.) Link                                      |   |   | + |   |   | + |
| <i>Peucedanum oreoselinum</i> (L.) Moench                                     | + | + | + | + | + | + |
| <i>Phleum pratense</i> L.                                                     |   |   |   |   |   |   |
| <i>Pimpinella major</i> (L.) Huds.                                            |   |   | + |   |   | + |
| <i>Pimpinella saxifraga</i> L.                                                |   | + | + | + |   |   |
| <i>Plantago lanceolata</i> L.                                                 | + |   | + |   |   | + |
| <i>Plantago major</i> L.                                                      | + | + | + |   |   | + |
| <i>Plantago media</i> L.                                                      | + | + | + | + |   | + |
| <i>Platanthera bifolia</i> (L.) Rich.                                         | + |   |   |   |   |   |
| <i>Poa pratensis</i> L.                                                       |   | + | + |   |   | + |
| <i>Polygala amara</i> L.                                                      |   |   | + |   |   |   |
| <i>Polygala vulgaris</i> L.                                                   | + | + | + |   |   |   |
| <i>Polygonatum multiflorum</i> (L.) All.                                      |   |   | + |   |   |   |
| <i>Potentilla erecta</i> (L.) Raeusch.                                        |   |   | + |   |   | + |
| <i>Primula vulgaris</i> Hudson                                                |   |   | + | + |   |   |
| <i>Prunella grandiflora</i> (L.) Scholler                                     |   | + |   | + | + | + |
| <i>Prunella laciniata</i> (L.) L.                                             | + |   | + |   |   | + |
| <i>Prunella vulgaris</i> L.                                                   |   |   |   |   |   | + |
| <i>Prunus spinosa</i> L.                                                      | + | + | + | + |   | + |
| <i>Ranunculus acris</i> L.                                                    | + | + | + | + | + | + |
| <i>Ranunculus bulbosus</i> L.                                                 |   |   |   | + |   | + |
| <i>Reseda lutea</i> L.                                                        |   | + | + |   |   |   |
| <i>Rhinanthus glacialis</i> Personnat                                         | + | + |   | + | + | + |
| <i>Rhinanthus minor</i> L.                                                    |   |   | + |   |   | + |
| <i>Rubus caesius</i> L.                                                       |   | + | + |   |   | + |
| <i>Rubus</i> sp.                                                              |   |   |   |   |   | + |
| <i>Rumex acetosa</i> L.                                                       |   |   |   | + |   |   |
| <i>Rumex obtusifolius</i> L.                                                  |   |   |   |   | + |   |
| <i>Salvia pratensis</i> L.                                                    | + | + | + | + |   | + |
| <i>Sanguisorba minor</i> Scop.                                                |   |   | + |   |   | + |
| <i>Scabiosa triandra</i> L.                                                   |   |   | + |   |   |   |



|                                                                          |   |   |   |   |   |   |   |   |   |   |   |   |   |   |   |   |   |   |   |   |   |   |   |   |   |   |
|--------------------------------------------------------------------------|---|---|---|---|---|---|---|---|---|---|---|---|---|---|---|---|---|---|---|---|---|---|---|---|---|---|
| <i>Cirsium pannonicum</i> (L. f.) Link                                   | 3 | 3 | 2 |   |   |   |   | + | 2 | 3 | 3 | 2 | 2 | 2 |   |   |   |   |   |   |   |   |   |   |   |   |
| <i>Colchicum autumnale</i> L.                                            |   |   | + | 1 |   |   |   | r | + |   |   | 3 | 1 |   |   |   |   |   |   |   |   |   |   | + | 2 |   |
| <i>Cynosurus cristatus</i> L.                                            |   |   |   | 1 |   | 1 |   |   |   |   |   |   |   |   |   |   |   |   |   |   |   |   |   | 1 |   |   |
| <i>Dactylis glomerata</i> L.                                             | 1 | 1 |   |   | 1 | 1 |   |   |   |   | 1 | 1 | 1 | 1 |   |   |   |   |   |   |   | 1 | 1 | 1 | + |   |
| <i>Dorycnium germanicum</i> (Gremli) Rikli                               |   |   |   |   | 2 |   |   |   |   |   |   |   |   | 2 |   |   |   | 1 |   |   |   |   |   |   |   |   |
| <i>Euphorbia cyparissias</i> L.                                          |   |   | 3 |   |   |   |   |   |   |   |   |   |   |   |   |   |   |   |   |   |   |   |   |   |   |   |
| <i>Euphorbia verrusoca</i> L.                                            | 3 | 2 | 1 |   |   |   | 2 | 2 | 3 | 2 | + | 1 | 2 |   |   | r |   | 1 | + | 1 | + | + | 1 | + |   |   |
| <i>Festuca pratensis</i> Huds.                                           |   |   |   | 3 | 2 |   | 2 | 1 | 1 | 1 | 1 | 1 | 2 |   |   |   | + |   |   |   | 1 | 1 | 1 | + |   |   |
| <i>Festuca valesiaca</i> agg.                                            |   |   |   |   |   |   | 3 |   |   |   |   |   |   | 2 | + |   |   | 1 |   |   |   | 1 |   |   |   |   |
| <i>Filipendula vulgaris</i> Moench                                       | 2 |   | 1 | 1 | 2 | 2 | 3 | 2 | r | 1 | 3 | r | 2 | + |   | + |   |   | 1 | 2 | 3 | + | 2 | 1 |   |   |
| <i>Galium verum</i> L.                                                   | 3 | 2 | 1 |   | 1 | 1 | 4 | 2 | 3 | 2 | 3 | 2 | 3 | 1 | 3 | 2 | 1 | 1 | 4 | 1 | 2 | 4 | 1 | 1 | 2 |   |
| <i>Genista tinctoria</i> L.                                              |   | + | 2 | + |   |   |   |   |   | + | r | 1 | + |   |   |   |   |   |   | + | 1 |   | 1 | 2 |   |   |
| <i>Gladiolus illyricus</i> Koch                                          | 2 | 1 | 3 |   |   |   |   | 1 | 1 |   |   | + | 1 |   |   |   |   |   |   |   | + | 3 |   |   |   |   |
| <i>Globularia punctata</i> Lapeyr.                                       |   |   |   |   |   |   |   |   |   |   |   |   |   |   |   |   |   | 1 |   |   |   |   |   |   |   |   |
| <i>Gymnadenia conopsea</i> subsp. <i>densiflora</i> (Wahlenb.) K. Richt. |   |   |   |   |   |   |   |   |   |   |   |   | r |   |   |   | r |   |   |   |   |   |   |   |   |   |
| <i>Helianthemum nummularium</i> (L.) Mill.                               |   |   |   |   | 1 |   |   |   |   |   |   |   |   |   |   |   |   | 1 |   |   |   |   |   |   |   |   |
| <i>Helictotrichon pubescens</i> (Huds.) Pilger                           |   |   |   |   |   |   |   |   |   |   |   |   |   |   |   |   |   |   |   |   |   |   |   |   |   |   |
| <i>Heracleum sphondylium</i> L.                                          |   |   |   |   |   |   |   |   |   |   | + |   |   |   |   |   |   |   |   |   |   |   |   |   |   |   |
| <i>Holcus lanatus</i> L.                                                 |   |   |   | 1 |   |   |   |   |   |   |   |   |   |   |   |   |   |   |   |   |   |   |   |   |   |   |
| <i>Hypochoeris maculata</i> L.                                           |   |   |   |   |   | r | 1 |   |   |   |   | r |   |   |   |   | 1 | 1 | 2 |   |   |   |   |   |   |   |
| <i>Knautia arvensis</i> (L.) Coulter                                     | 1 | 1 |   |   |   |   | 2 | + | 1 |   |   | r |   |   | r |   |   |   |   |   |   |   |   |   |   |   |
| <i>Koeleria pyramidata</i> (Lam.) PB.                                    | 1 |   | 1 |   |   |   |   |   |   |   |   |   |   | + |   |   | r | + |   | r |   | 1 | + |   |   |   |
| <i>Lathyrus pratensis</i> L.                                             |   |   |   |   |   |   |   |   |   | + |   |   |   |   | + |   |   |   |   |   |   |   |   |   |   |   |
| <i>Lilium bulbiferum</i> L.                                              |   |   |   |   |   |   |   |   | r |   |   |   |   |   |   |   | + |   |   |   |   |   |   |   |   |   |
| <i>Linum catharticum</i> L.                                              | 1 |   | 2 |   |   |   |   |   |   |   |   |   |   |   |   |   |   |   |   |   |   |   |   |   |   |   |
| <i>Linum viscosum</i> L.                                                 |   |   |   |   |   |   | 3 | 2 | 2 | r | 1 |   |   |   |   |   | r |   |   |   |   | + |   | + | 1 |   |
| <i>Lotus corniculatus</i> L.                                             |   | + | 1 | 1 |   |   | + |   |   |   | + | r |   |   | 1 |   | + |   | 1 | 1 | 1 | + | r | 1 | + |   |
| <i>Lotus corniculatus</i> L. subsp. <i>Hirsutus</i> Rothm.               |   |   |   |   |   |   |   |   |   |   | r |   |   |   |   |   |   |   |   |   |   |   |   |   |   |   |
| <i>Luzula campestris</i> (L.) DC.                                        |   |   |   |   |   |   |   |   |   |   |   |   |   |   |   |   |   |   | r |   |   |   |   |   |   |   |
| <i>Medicago lupulina</i> L.                                              |   |   |   |   |   |   |   |   |   |   |   |   |   | 2 | 2 |   |   |   | 1 |   |   |   |   |   |   |   |
| <i>Onobrychis viciifolia</i> Scop.                                       |   |   |   |   | 1 |   |   |   |   |   |   |   |   |   | + | 2 |   |   | 2 |   |   |   |   |   |   |   |
| <i>Ononis spinosa</i> L.                                                 |   | 1 |   |   |   |   |   |   |   |   |   |   |   |   |   |   |   |   |   |   |   |   |   |   |   |   |
| <i>Ophrys holoserica</i> (Burm. f.) Greuter                              |   | + | 1 |   |   |   |   |   |   |   |   |   |   |   |   |   | r |   |   |   |   |   |   |   |   |   |
| <i>Anacamptis coriophora</i> (L.) R. M. Bateman, Pridgeon & M. W. Chase  |   |   |   |   |   |   |   |   |   | r |   |   |   |   |   |   |   |   |   |   |   |   |   |   |   |   |
| <i>Neotinea tridentata</i> (Scop.) R. M. Bateman, Pridgeon & M. W. Chase |   |   |   |   |   |   |   |   |   |   |   |   |   |   |   |   | r |   |   |   |   |   |   |   |   |   |
| <i>Ornithogalum pyrenaicum</i> L.                                        |   |   |   |   |   |   |   |   |   | r |   |   |   |   |   |   | + |   |   | 1 |   |   |   | r |   |   |
| <i>Orobanche</i> sp.                                                     |   |   |   |   |   |   |   |   |   |   |   |   |   |   |   |   | r |   |   |   |   | + |   |   |   |   |
| <i>Peucedanum oreoselinum</i> (L.) Moench                                | 2 | 4 | 4 | 1 | 4 | 2 | 2 | 3 | 2 | 2 | 2 | 1 | 3 | 2 | 2 | 2 | 2 | 2 | 2 | + | + | 3 | + | 2 | 1 | 4 |
| <i>Pimpinella major</i> (L.) Huds.                                       |   | + |   | 1 |   |   | + |   | + |   |   |   |   | 1 |   | 1 |   |   |   |   |   | + |   |   |   |   |
| <i>Plantago lanceolata</i> L.                                            | 1 | 1 |   |   | 1 |   | 1 |   | 1 | 1 |   | r |   | 1 | + | + | + |   |   |   |   |   |   |   |   |   |
| <i>Plantago media</i> L.                                                 |   |   |   | 3 |   | + | + | + |   | + |   |   |   | 1 |   | 1 | + | + |   |   |   |   |   |   |   |   |
| <i>Poa pratensis</i> L.                                                  |   |   |   |   |   |   |   |   |   |   |   |   |   |   |   |   |   |   | r |   |   |   |   | 1 |   |   |
| <i>Potentilla erecta</i> (L.) Raeusch.                                   |   | + |   |   |   |   |   |   |   |   |   |   |   |   |   |   |   |   |   |   |   |   |   |   |   |   |
| <i>Prunus spinosa</i> L.                                                 |   |   |   |   |   |   |   |   |   |   |   |   |   |   |   |   |   |   |   | 1 | 1 | r |   |   |   |   |
| <i>Ranunculus acris</i> L.                                               | 2 | 2 | 2 |   |   |   | 2 | 2 | 1 |   | 1 | 2 |   |   |   |   |   |   |   |   |   |   |   |   | r |   |
| <i>Rhinanthus glacialis</i> Personnat                                    |   | 1 |   | 3 | 4 | 2 | + | 1 | 2 |   |   |   |   |   |   |   |   |   |   |   | 1 |   |   |   |   |   |
| <i>Rubus</i> sp.                                                         |   |   |   |   |   |   |   |   |   |   | + |   |   |   |   |   |   |   |   |   |   |   |   |   |   |   |
| <i>Salvia pratensis</i> L.                                               | 2 | 2 |   | 3 |   | 1 | 2 | 1 |   | 1 | 2 | 1 | 1 | 2 | 2 | 1 | 2 | 2 | 1 | 2 | r | 1 | + | 1 |   |   |
| <i>Sedum acre</i> L.                                                     |   |   |   |   |   |   |   |   |   |   |   |   |   |   |   | + |   |   |   |   |   |   |   |   |   |   |
| <i>Silene vulgaris</i> (Moench) Garcke                                   |   |   |   |   |   |   | + |   |   |   |   |   |   | 1 | 1 |   |   |   |   |   |   |   |   |   |   |   |
| <i>Seseli annuum</i> L.                                                  |   |   |   |   |   |   |   |   |   |   |   |   |   |   |   |   |   |   | r |   |   |   |   |   |   |   |
| <i>Thalictrum minus</i> L.                                               |   |   |   |   |   |   |   |   |   |   |   |   |   |   |   |   |   |   |   |   |   |   |   |   | 2 |   |

|                                                                                                          |         |   |   |   |  |   |   |  |   |   |   |   |   |   |   |   |   |   |
|----------------------------------------------------------------------------------------------------------|---------|---|---|---|--|---|---|--|---|---|---|---|---|---|---|---|---|---|
| <i>Thymus vulgaris</i> L.                                                                                | 1       |   |   |   |  |   |   |  |   |   |   |   |   |   |   |   |   |   |
| <i>Tragopogon pratensis</i> L.                                                                           | 1       |   |   |   |  |   |   |  |   |   |   |   |   |   |   |   |   |   |
| <i>Trifolium montanum</i> L.                                                                             | 2       | 1 | 1 | 2 |  | 1 | 1 |  | 1 | 1 | + | 1 | 1 | + | 2 | + | 1 | 1 |
| <i>Trisetum flavescens</i> (L.) PB.                                                                      | + r     |   |   |   |  |   |   |  |   |   |   |   |   |   |   |   |   |   |
| <i>Veronica barrelieri</i> subsp. <i>nitens</i> Schott ex<br>Roem. & Schult. subsp. <i>nitens</i> (Host) | + 1 + 1 |   |   |   |  |   |   |  |   |   |   |   |   |   |   |   |   |   |
| <i>Vicia cracca</i> L.                                                                                   | + + r   |   |   |   |  |   |   |  |   |   |   |   |   |   |   |   |   |   |
| <i>Helictotrichon</i> sp.                                                                                | 1       |   |   |   |  |   |   |  |   |   |   |   |   |   |   |   |   |   |
